# Supplementary material for: Development of gelatin methacrylate (GelMa) hydrogels for versatile intracavitary applications
Source: Royal Society of Chemistry journal article supplement (doi:10.1039/d2bm00022a), 2022-01-01
Supplement: d2bm00022a1.pdf [file d2bm00022a1.pdf]

## Supplementary Information

### Development of Gelatin Methacrylate (GelMa) Hydrogels for Versatile Intracavitary

### Applications: *In-vitro* Characterization and *Ex-vivo* Performance Assessment

Nishant S. Kulkarni, Gautam Chauhan, Mimansa Goyal, Sruthi Sarvepalli, and Vivek Gupta\*

College of Pharmacy and Health Sciences  
St. John's University, Queens, NY 11439, USA

**Fig. S1:** 3D surface plot represents the effect of GelMa and BIS concentrations on the gelling time. It can be concluded that both GelMa and BIS concentrations have no effect on gelling time.

**Fig. S2:** 3D surface plot represents the effect of GelMa and BIS concentrations on the injectability force (N). Increasing BIS concentration increases the force required for injecting precursor solutions of hydrogel formulations

**Fig. S3:** 3D surface plot represents the effect of Gelma, LAP, and BIS concentrations on the swelling index.

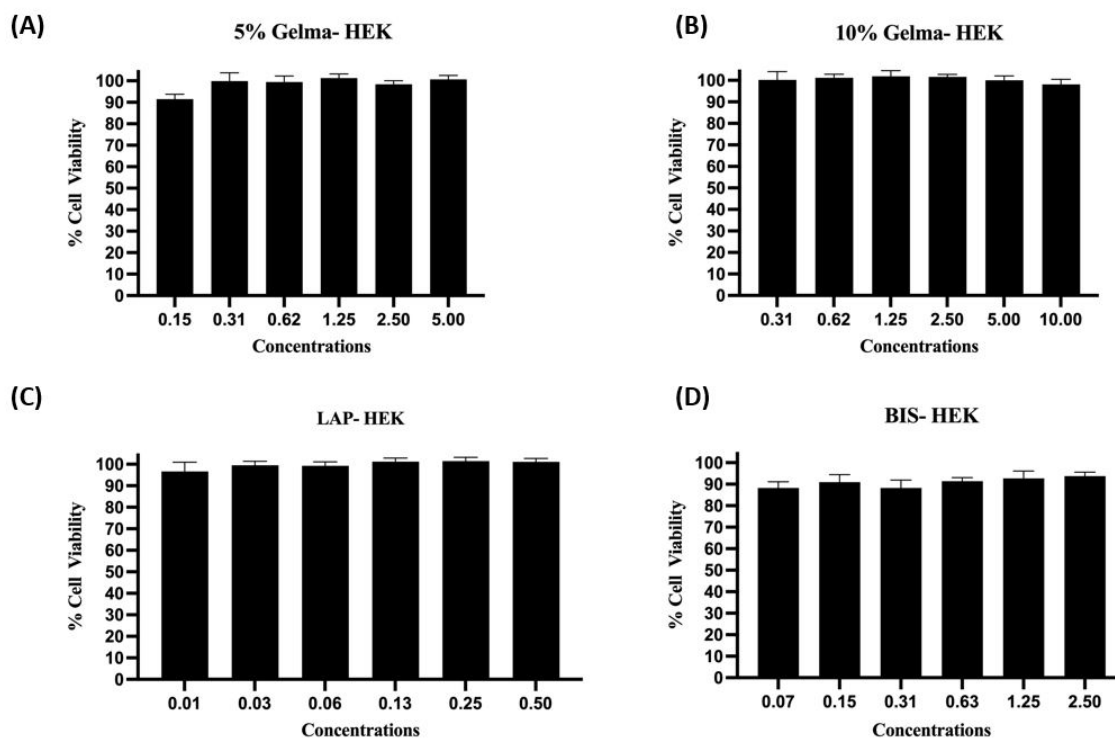

**Fig. S4:** Plots represents the toxicity profiles of individual hydrogel components on non-cancerous HEK-293 cells (24hrs).

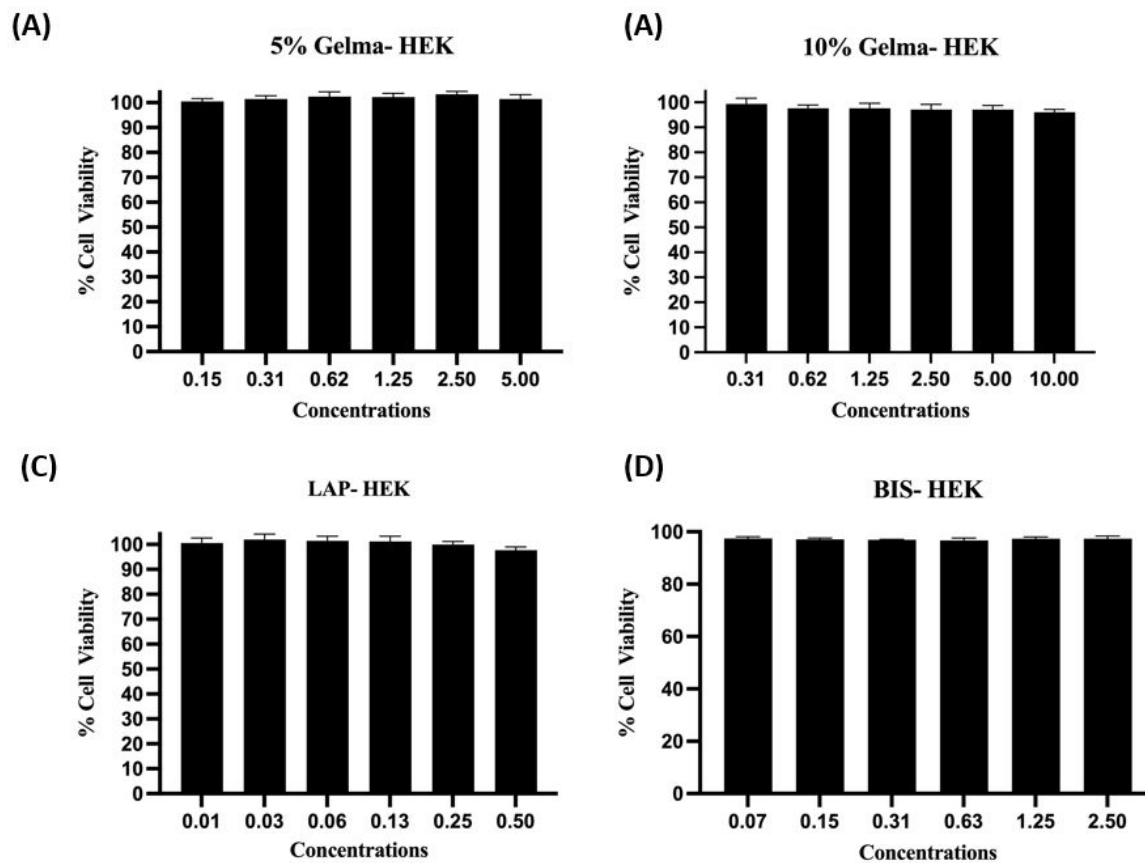

**Fig. S5:** Plots represents the toxicity profiles of individual hydrogel components on non-cancerous HEK-293 cells (72hrs).
